# Supplementary material
Source: publisher site journal article supplement (https://www.dovepress.com/article/458925)
Supplement: Supplementary file 1 [file get_supplementary_file.php]

**
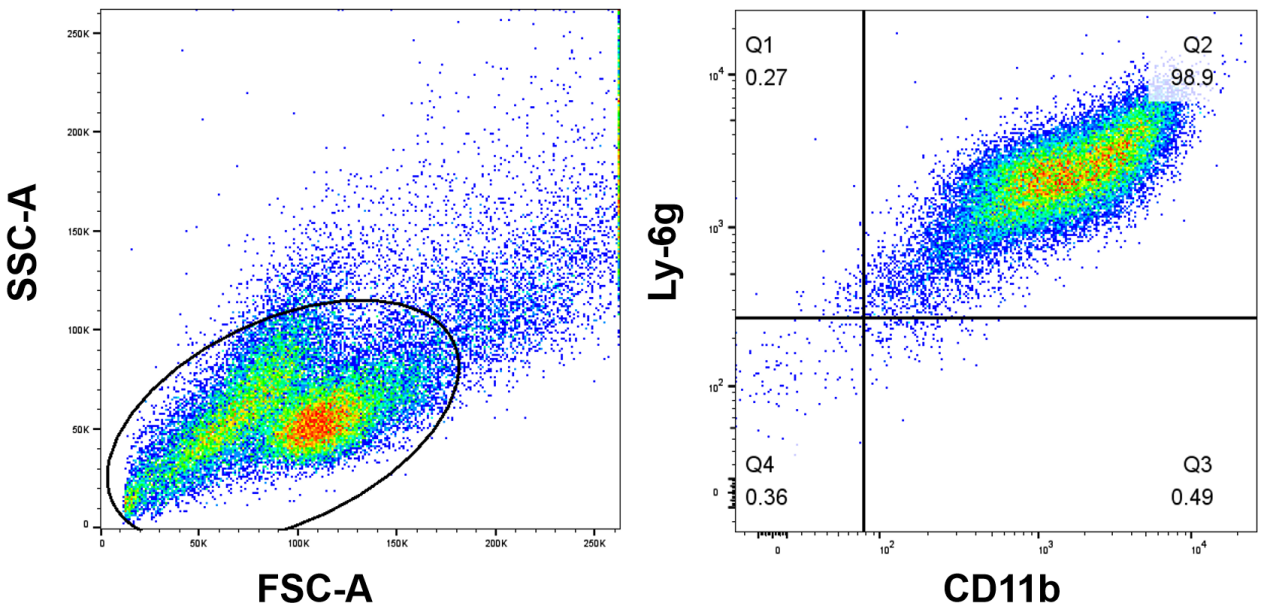
**

**Figure S1. Flow cytometry analyzed the purification of neutrophils that derived from bone marrow samples of mice.** Neutrophil population was characterized as CD11b+Ly-6g+ cells.


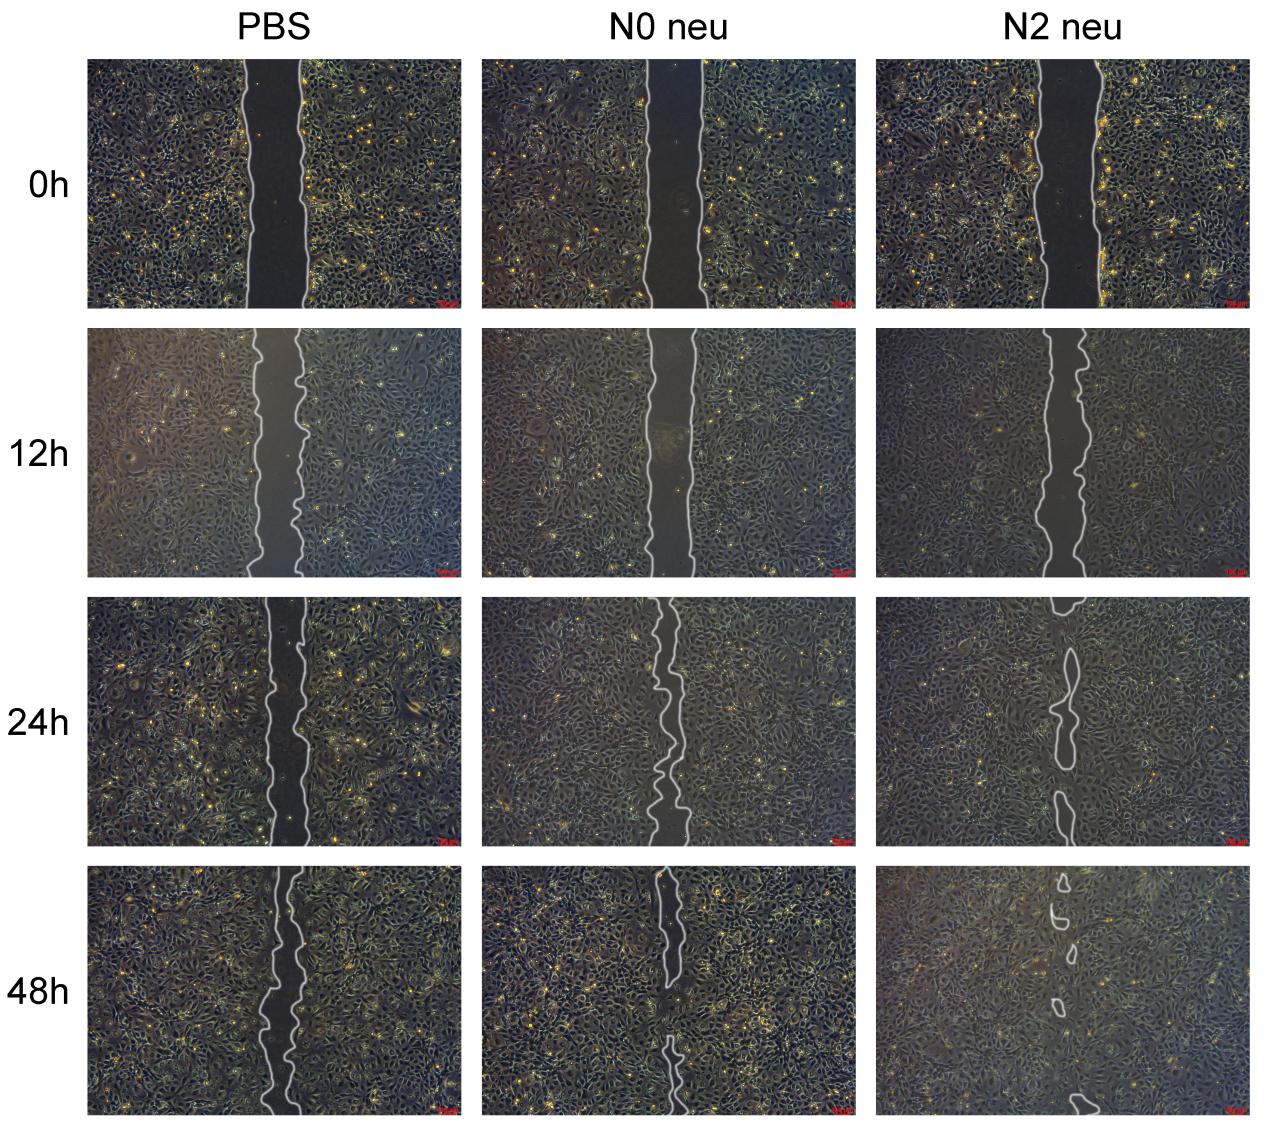


**Figure S2. Representative images of the scratch healing assay.** Different phenotype of neutrophils were co-cultured with endothelial cell and evaluated the effects on repair rate.


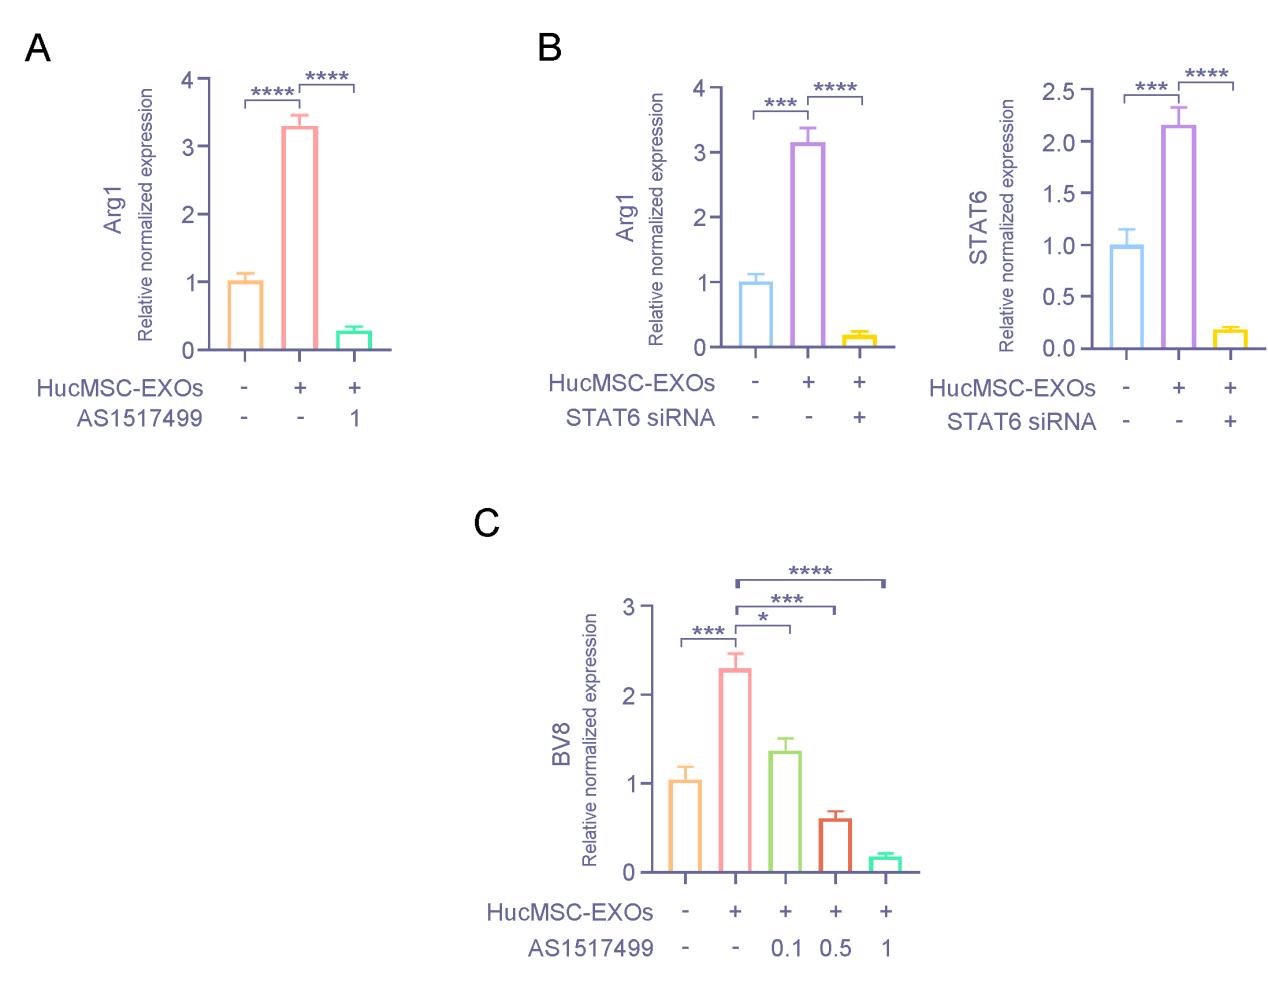


**Figure S3. HucMSC-Exo induced stat6 activation and thereby skewed neutrophil to an N2 phenotype.** (A) HL-60 neutrophils were treated with HucMSC-Exo or AS1517499 and Arg1 expressions were examined by qRT-PCR. GAPDH was used as a normalization control (n=3). (B) HL-60 cells were treated with or without STAT6 siRNA in the presence of HucMSC-Exo followed by examining the expressions of STAT6 and N2 (Arg1) marker by qRTPCR. GAPDH was used as a normalization control (n=3). (C) Mouse primary neutrophils were treated with hucMSC-Exo or AS1517499 at various concentrations and BV8 expressions were examined by qRT-PCR. GAPDH was used as a normalization control (n=3). [*p < 0.05, **p < 0.01, ***p < 0.001, ****p < 0.0001; data were expressed as mean ± SD and analyzed by unpaired two-tailed t-test].

**Table S1.**

**Sequences of the synthetic siRNA against human STAT6 and mouse BV8**

| **Strand Name** | **Sequence (5’-3’)** |
| --- | --- |
| *STAT6: Sense* | UGGAAGCAGGAAGAACUCAAGUUUA |
| *STAT6: Anti-sense* | UAAACUUGAGUUCUUCCUGCUUCCA |
| *BV8: Sense* | GGACUUCUUUCAACCGGUUUAUUUG |
| *BV8: Anti-sense* | CAAAUAAACCGGUUGAAAGAAGUCC |

**Table S2. List of primers used in the study**

| **Primer name (Mouse)** | **Sequence (5’ to 3’)** |
| --- | --- |
| *miNOS-F* | GTTCTCAGCCCAACAATACAAGA |
| *miNOS-R* | GTGGACGGGTCGATGTCAC |
| *mIL-1β-F* | GAAATGCCACCTTTTGACAGTG |
| *mIL-1β-R* | TGGATGCTCTCATCAGGACAG |
| *mTNF-α-F* | CAGGCGGTGCCTATGTCTC |
| *mTNF-α-R* | CGATCACCCCGAAGTTCAGTAG |
| *mArg-1-F* | CTCCAAGCCAAAGTCCTTAGAG |
| *mArg-1-R* | GGAGCTGTCATTAGGGACATCA |
| *mCD206-F* | CTCTGTTCAGCTATTGGACGC |
| *mCD206-R* | TGGCACTCCCAAACATAATTTGA |
| *mCD163-F* | GGTGGACACAGAATGGTTCTTC |
| *mCD163-R* | CCAGGAGCGTTAGTGACAGC |
| *mSTAT6-F* | CTCTGTGGGGCCTAATTTCCA |
| *mSTAT6-R* | GCATCTGAACCGACCAGGAAC |
| *mPPARγ-F* | GGAAGACCACTCGCATTCCTT |
| *mPPARγ-R* | GTAATCAGCAACCATTGGGTCA |
| *mCpt1b-F* | GACTTCCGGCTTAGTCGGG |
| *mCpt1b-R* | GAATAAGGCGTTTCTTCCAGGA |
| *mAcadm-F* | AACACAACACTCGAAAGCGG |
| *mAcadm-R* | TTCTGCTGTTCCGTCAACTCA |
| *mAcadl-F* | TTTCCTCGGAGCATGACATTTT |
| *mAcadl-R* | GCCAGCTTTTTCCCAGACCT |
| *mBV8-F* | GCCCCGCTACTGCTACTTC |
| *mBV8-R* | CCGCACTGAGAGTCCTTGTC |
| *mGAPDH-F* | AGGTCGGTGTGAACGGATTTG |
| *mGAPDH-R* | GGGGTCGTTGATGGCAACA |
